# Supplementary material
Source: publisher site journal article supplement (https://www.spandidos-publications.com/3343/downloadSupplementary)

Figure S1. HIF-1 $\alpha$ /TGF- $\alpha$  expression attenuates sensitivity to osimertinib in RPC-9 cells harboring EGFR mutations. (A) Effect of gefitinib or osimertinib on RPC-9 or H1975 cell viability 50% inhibitory concentration: RPC-9 (gefitinib, not reached; osimertinib, 17.46 nM); H1975 (gefitinib, not reached; osimertinib: 7.81 nM). Data are presented as the mean  $\pm$  SEM. (B) Phospho-RTK array. Effect of osimertinib (5 mg/kg/day, day 7) on receptor tyrosine kinase phosphorylation in RPC-9 cell xenograft tumors from the conventional or large models. (C) Correlation between HIF-1 $\alpha$  and TGF- $\alpha$  expression levels. (D) Crystal violet assay. Effect of osimertinib (72 h) on the viability of RPC-9 cells pre-incubated under hypoxic or normoxic conditions. HIF-1 $\alpha$ , hypoxia-inducible factor-1 $\alpha$ ; TGF- $\alpha$ , transforming growth factor- $\alpha$ ; Osi, osimertinib.

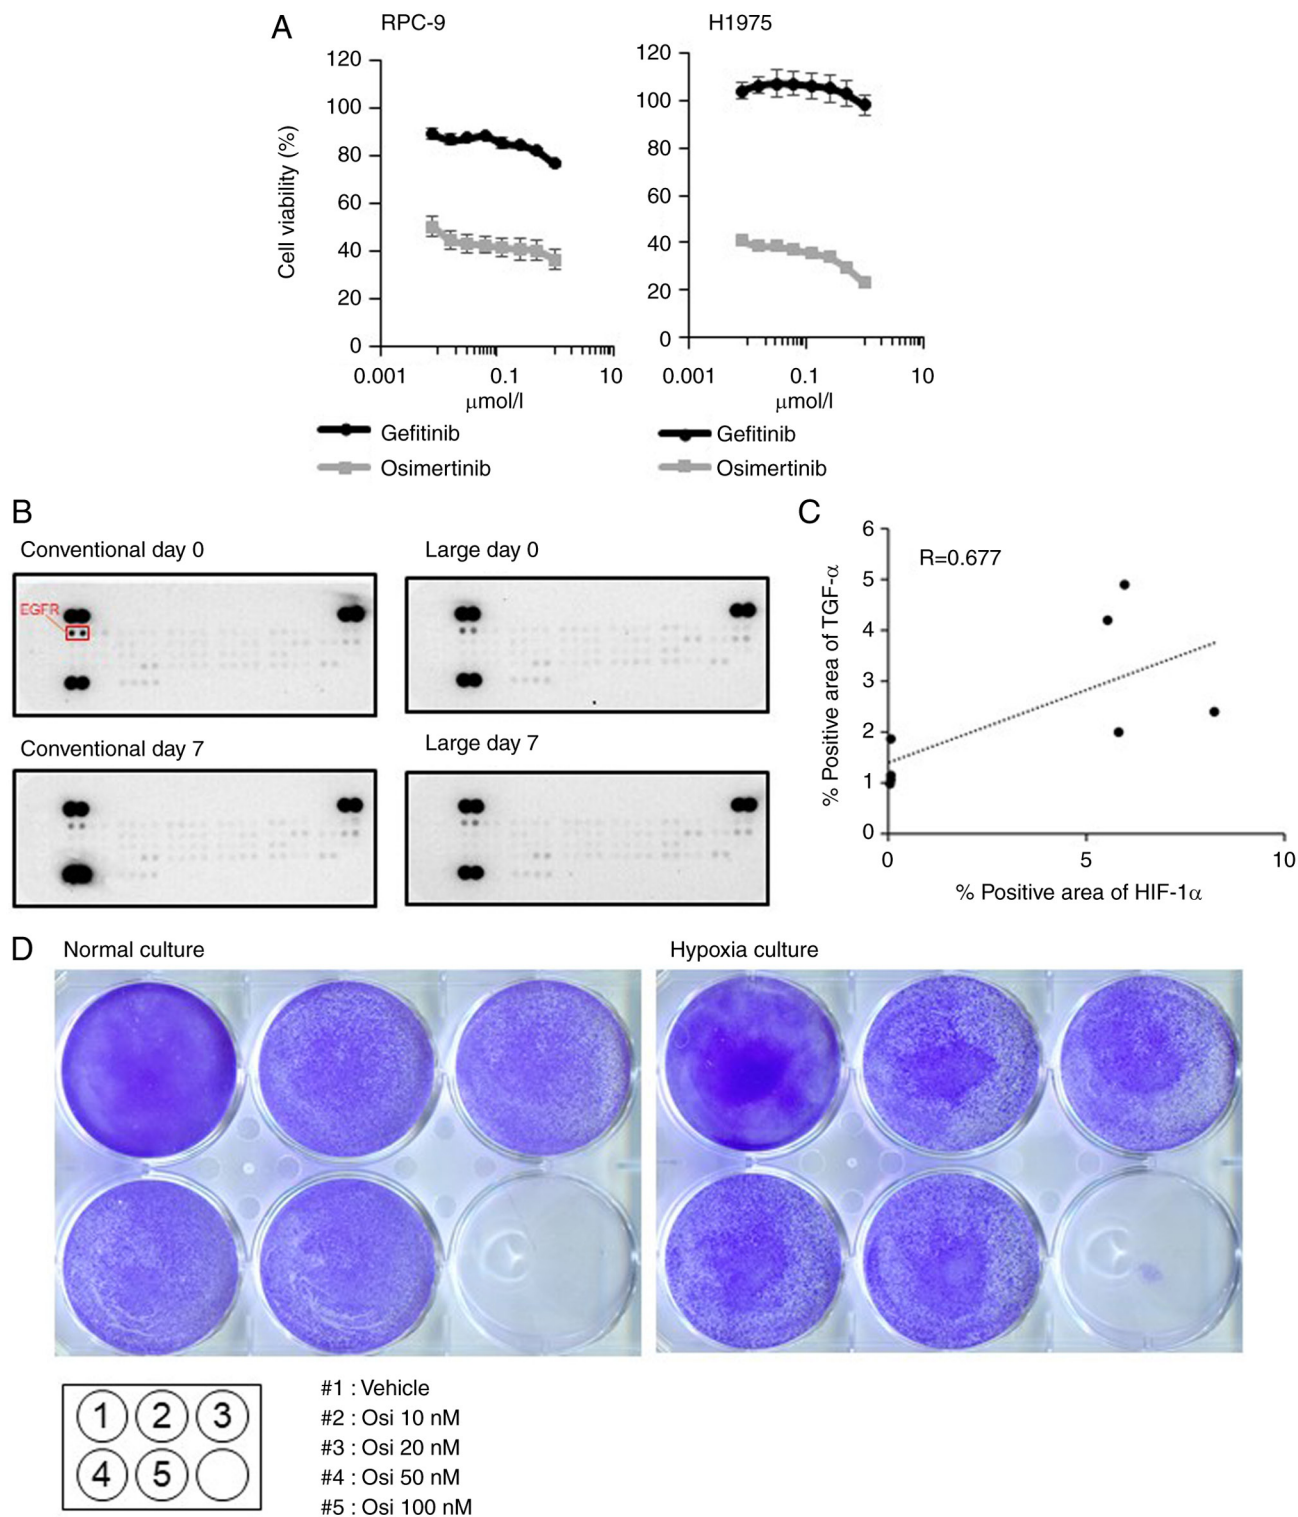

Figure S2. Inhibitory effect of cetuximab, osimertinib or a combination of osimertinib and cetuximab (72 h) on the viability of RPC-9 cells pre-incubated under hypoxic conditions for 48 h. Crystal violet assay data were quantified using ImageJ software. Data are presented as the mean  $\pm$  SEM. Comb., combination of osimertinib and cetuximab.

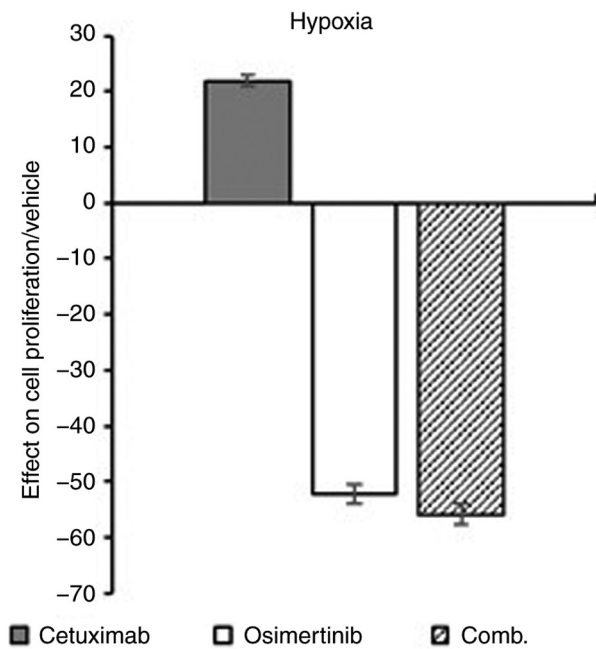

Figure S3. Effect of bevacizumab, cetuximab or a triple therapy with osimertinib, bevacizumab and cetuximab in xenograft tumors with HIF-1 $\alpha$ /TGF- $\alpha$  expression. (A) Effect of bevacizumab (5 mg/kg, twice/week) and cetuximab (1 mg/body, twice/week) for 28 days on RPC-9 cell xenograft tumors from the large model (starting tumor volume, 500 mm<sup>3</sup>; n=8), with a 28-day observation period. (B) Effect of osimertinib monotherapy (5 mg/kg, 5 times/week), its combination with cetuximab (1 mg/body, twice/week) or triple therapy with bevacizumab (5 mg/kg, twice/week) and cetuximab (1 mg/body, twice/week) for 28 days on RPC-9 cell xenograft tumors from the large model (starting tumor volume, 500 mm<sup>3</sup>; n=6), with a 28-day observation period. Data are presented as the mean  $\pm$  SEM. \*\*P<0.01. n.s., not significant.

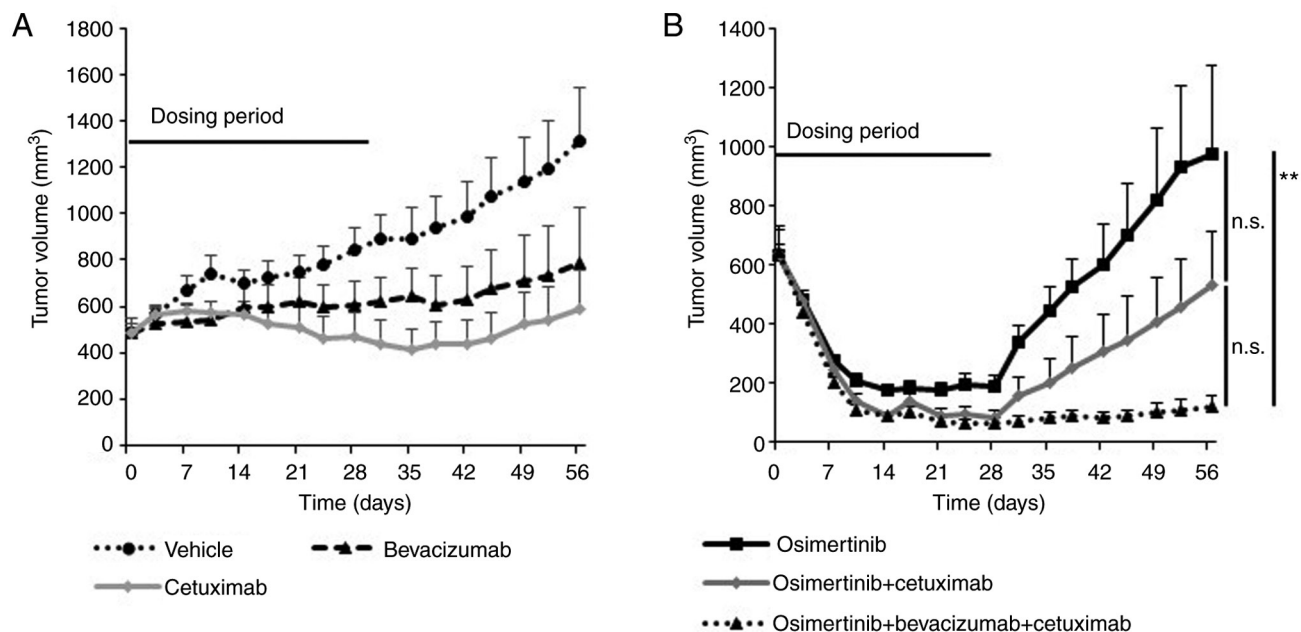

Figure S4. Mechanism of triple therapy with osimertinib, bevacizumab and cetuximab in tumors with HIF-1 $\alpha$ /TGF- $\alpha$  expression. (A-a) EGFR-mutant lung cancer with low HIF-1 $\alpha$ /TGF- $\alpha$  expression. (b) Osimertinib plus bevacizumab inhibits EGFR signaling and angiogenesis. (B-a) EGFR-mutant lung cancer with high HIF-1 $\alpha$ /TGF- $\alpha$  expression. (b) Osimertinib plus bevacizumab does not inhibit the activation loop of the HIF-1 $\alpha$ /TGF- $\alpha$  axis. (C) EGFR-mutant lung cancer with high HIF-1 $\alpha$ /TGF- $\alpha$  expression. Triple therapy with osimertinib, bevacizumab and cetuximab inhibits EGFR signaling, angiogenesis and the activation loop of the HIF-1 $\alpha$  /TGF- $\alpha$  axis. HIF-1 $\alpha$ , hypoxia-inducible factor-1 $\alpha$ ; TGF- $\alpha$ , transforming growth factor- $\alpha$ ; EGFR, epidermal growth factor receptor; Osi, osimertinib; Bev, bevacizumab; Cetu, cetuximab.

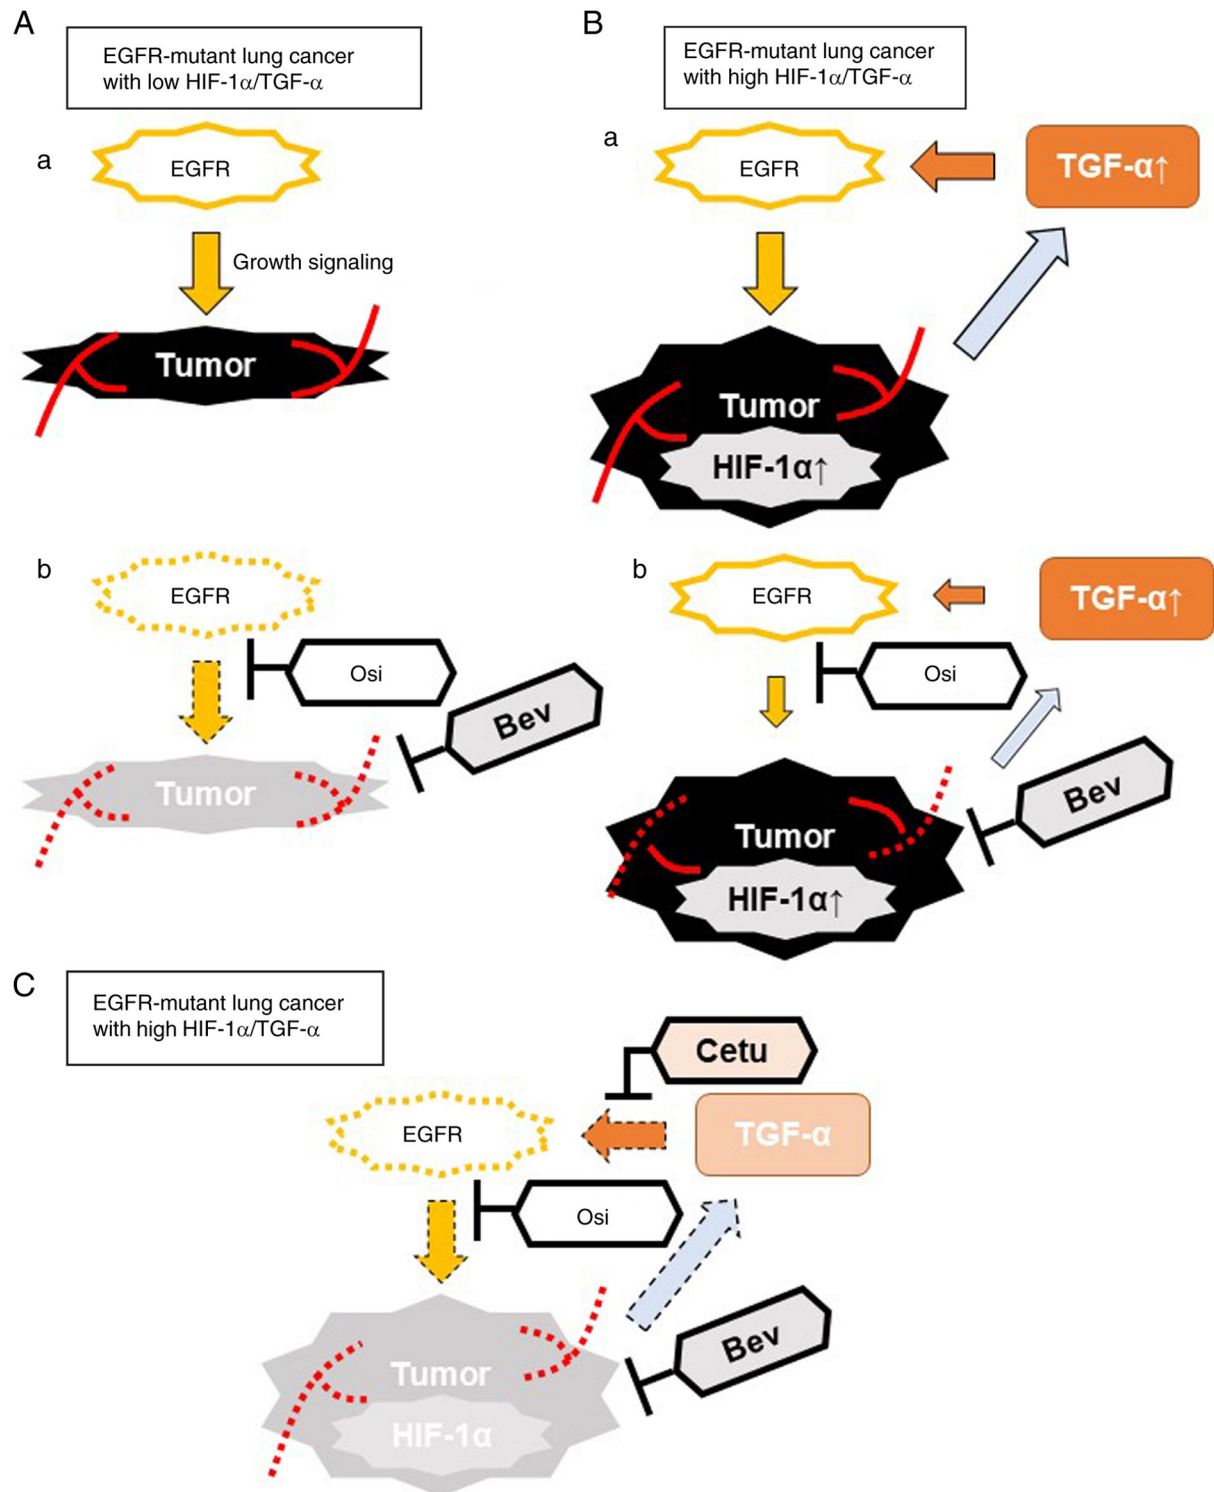

Supplement: Supplementary file 1 [file downloadSupplementary]
